# Supplementary material for: A pancreatic exocrine-like cell regulatory circuit operating in the upper stomach of the sea urchin Strongylocentrotus purpuratus larva
Source: PubMed Central journal article supplement (PMC4880809; doi:10.1186/s12862-016-0686-0), 2016-05-26
Supplement: 12862_2016_686_MOESM1_ESM.pdf [file 12862_2016_686_MOESM1_ESM.pdf]

Supplementary Table 1

List of primers used for FISH probes

| Gene name        | Gene ID (echinobase) | Forward                       | Reverse                     |
|------------------|----------------------|-------------------------------|-----------------------------|
| <i>SpHnf</i>     | 008196               | 5'-CCGAATACAGCCCACAAGAT-3'    | 5'-CGATGGTAGTTTTCGTGCTCA-3' |
| <i>SpPtf1a</i>   | 015953               | 5'-GAATGTCTTCGAACCCCTCA-3';   | 5'-TACTGTTTTGGGTCCCCTTG-3'  |
| <i>SpMist</i>    | 027623               | 5'-TGTCTTGGAGCCAGTTCGAC-3'    | 5'-GCTCGTCATTGAGATCATCG-3'  |
| <i>SpCpa2L</i>   | 015178.3             | 5'-CCGGACGATAGTTTCTTCAA-3'    | 5'-TGTTTGCAGAGTGCCTTGAC-3'  |
| <i>SpPnlp2/5</i> | 012906<br>015110     | 5'-CCTGTTGGTATTTTTCCTTACCC-3' | 5'-GGTAACTAGTCCGCCATGC-3'   |
| <i>SpAmy3</i>    | 014671               | 5'-AAGATTTTTGGGGCCTTACG-3'    | 5'-TTGGAGATGTGGGCACAGTA-3'  |
| <i>SpFng</i>     | 004621               | 5'-ATGGCAGGAAAACAAACAGG-3'    | 5'-GTGGCTGGACAGTTTCCATT-3'  |

List of primers used for qPCR analysis

| Gene name | Forward                       | Reverse                    |
|-----------|-------------------------------|----------------------------|
| SpUbi     | 5'-CACAGGCAAGACCATCACAC-3'    | 5'-GAGAGAGTGCGACCATCCTC-3' |
| SpPtf1a   | 5'-GAATGTCTTCGAACCCCTCA-3'    | 5'-GATGACATCCGCTTCCTCTC-3' |
| SpMist    | 5'-ATGTGAATCTTCGACCGGGT-3'    | 5'-GGCATCGTTAAGTGTGTGCA-3' |
| SpHnf     | 5'-CCGAATACAGCCCACAAGAT-3'    | 5'-TGCGAGAGATGTGATTGGTT-3' |
| SpCpa2L   | 5'-CAGCGATGTGACTGAGATCC-3'    | 5'-GATCTACTCCTCGGCAAACG-3' |
| SpPnlp2/5 | 5'-GACGTCATACACACCGATGC-3'    | 5'-ATGACTGCATCCCGAGAAGA-3' |
| SpAmy3    | 5'-TGAAATGTTGACGAGGTGA-3'     | 5'-TTGGAGATGTGGGCACAGTA-3' |
| SpFng_    | 5'-GCTGATGAAGTTACTCAGGCAGT-3' | 5'-AGCTAGTGCCTTGCTGATGC-3' |
